# Supplementary material for: Electronic Cigarette Use in Students and Its Relation with Tobacco-Smoking: A Cross-Sectional Analysis of the i-Share Study
Source: MDPI journal article supplement (doi:10.3390/ijerph14111345), 2017-11-05
Supplement: s1 [file s1]

**Table S1.** Comparison between students who participated in the e-cigarette survey and those who did not.

|                                                        | Guest students<br>n=8431<br>n (%) | No Participants<br>n=5556<br>n (%) | Participants<br>n=2875<br>n (%) | p*      |
|--------------------------------------------------------|-----------------------------------|------------------------------------|---------------------------------|---------|
| Gender                                                 |                                   |                                    |                                 | 0,0002  |
| Men                                                    | 2093 (24.8)                       | 1450 (26.1)                        | 643 (22.4)                      |         |
| Women                                                  | 6338 (75.2)                       | 4106 (73.9)                        | 2232 (77.6)                     |         |
| Age in categories (years)                              |                                   |                                    |                                 | <0.0001 |
| 18 – 20                                                | 3549 (42.1)                       | 2227 (40.1)                        | 1322 (46.0)                     |         |
| 21 – 24                                                | 3885 (46.1)                       | 2612 (47.0)                        | 1273 (44.3)                     |         |
| 25 and over                                            | 997 (11.8)                        | 717 (12.9)                         | 280 (9.7)                       |         |
| Academic year of study                                 |                                   |                                    |                                 | 0.1184  |
| First year                                             | 3462 (41.0)                       | 2331 (42.0)                        | 1131 (39.3)                     |         |
| Second year                                            | 1626 (19.3)                       | 1053 (18.9)                        | 573 (19.9)                      |         |
| Third year                                             | 1254 (14.9)                       | 824 (14.8)                         | 430 (15.0)                      |         |
| Fourth year or higher year of post-secondary education | 2089 (24.8)                       | 1348 (24.3)                        | 741 (25.8)                      |         |
| Universities and higher education institutes location  |                                   |                                    |                                 | 0.0001  |
| Bordeaux campuses                                      | 5017 (59.5)                       | 3242 (58.3)                        | 1775 (61.7)                     |         |
| Nice campus                                            | 589 (7.0)                         | 413 (7.4)                          | 176 (6.1)                       |         |
| Paris campuses                                         | 212 (2.5)                         | 120 (2.2)                          | 92 (3.2)                        |         |
| Versailles campuses                                    | 935 (11.1)                        | 645 (11.6)                         | 290 (10.1)                      |         |
| Other                                                  | 1678 (19.9)                       | 1136 (20.5)                        | 542 (18.9)                      |         |
| University major <sup>1</sup>                          |                                   |                                    |                                 | <0.0001 |
| Sciences                                               | 1054 (16.5)                       | 737 (17.5)                         | 317 (14.4)                      |         |
| Healthcare                                             | 2209 (34.5)                       | 1222 (29.1)                        | 987 (44.9)                      |         |
| Economics, management and law                          | 768 (12.0)                        | 575 (13.7)                         | 193 (8.8)                       |         |
| Literature, arts, humanities, and social sciences      | 1647 (25.7)                       | 1193 (28.4)                        | 454 (20.6)                      |         |
| Other                                                  | 722 (11.3)                        | 474 (11.3)                         | 248 (11.3)                      |         |
| Educational level of parents <sup>2</sup>              |                                   |                                    |                                 | 0.0002  |
| Higher education study or university                   | 3267 (40.8)                       | 2077 (39.5)                        | 1190 (43.3)                     |         |
| High school                                            | 2158 (27.0)                       | 1477 (28.1)                        | 681 (24.8)                      |         |
| Vocational study                                       | 2308 (28.9)                       | 1507 (28.7)                        | 801 (29.2)                      |         |
| Primary education                                      | 266 (3.3)                         | 193 (3.7)                          | 73 (2.7)                        |         |
| Income source                                          |                                   |                                    |                                 |         |
| Family <sup>3</sup>                                    |                                   |                                    |                                 | <0.0001 |
| Yes                                                    | 6843 (87.5)                       | 4441 (86.0)                        | 2402 (90.5)                     |         |
| No                                                     | 977 (12.5)                        | 725 (14.0)                         | 252 (9.5)                       |         |
| Scholarship <sup>4</sup>                               |                                   |                                    |                                 | <0.0001 |
| Yes                                                    | 3174 (49.9)                       | 2058 (47.5)                        | 1116 (55.2)                     |         |
| No                                                     | 3183 (50.1)                       | 2278 (52.5)                        | 905 (44.8)                      |         |
| Paid employment <sup>5</sup>                           |                                   |                                    |                                 | 0.0002  |
| Yes                                                    | 3383 (51.8)                       | 2243 (50.3)                        | 1140 (55.2)                     |         |
| No                                                     | 3144 (48.2)                       | 2219 (49.7)                        | 925 (44.8)                      |         |

\*Chi2 test. Missing data: <sup>1</sup> n=2031; <sup>2</sup> n=432; <sup>3</sup> n=611; <sup>4</sup> n=2074; <sup>5</sup> n=1904.

**Table S2.** Responders included in analysis about e-cigarette use and those excluded.

|                                                        | All<br>responders<br>n=2875 | Subjects<br>excluded <sup>6</sup><br>n=155 | Subjects<br>included <sup>6</sup><br>n=2720 | <i>p</i> <sup>*</sup> |
|--------------------------------------------------------|-----------------------------|--------------------------------------------|---------------------------------------------|-----------------------|
|                                                        | n (%)                       | n (%)                                      | n (%)                                       |                       |
| Gender                                                 |                             |                                            |                                             | 0.4675                |
| Men                                                    | 643 (22.4)                  | 31 (20.0)                                  | 612 (22.5)                                  |                       |
| Women                                                  | 2232 (77.6)                 | 124 (80.0)                                 | 2108 (77.5)                                 |                       |
| Age in categories (years)                              |                             |                                            |                                             | <0.0001               |
| [18 – 20]                                              | 1322 (46.0)                 | 21 (13.5)                                  | 1301 (47.8)                                 |                       |
| [21 – 24]                                              | 1273 (44.3)                 | 68 (43.9)                                  | 1205 (44.3)                                 |                       |
| [25] and over                                          | 280 (9.7)                   | 66 (42.6)                                  | 214 (7.9)                                   |                       |
| Academic year of study                                 |                             |                                            |                                             | <0.0001               |
| First year                                             | 1131 (39.3)                 | 24 (15.5)                                  | 1107 (40.7)                                 |                       |
| Second year                                            | 573 (19.9)                  | 18 (11.6)                                  | 555 (20.4)                                  |                       |
| Third year                                             | 430 (15.0)                  | 17 (11.0)                                  | 413 (15.2)                                  |                       |
| Fourth year or higher year of post-secondary education | 741 (25.8)                  | 96 (61.9)                                  | 645 (23.7)                                  |                       |
| Universities and higher education institutes location  |                             |                                            |                                             | 0.0347                |
| Bordeaux campuses                                      | 1774 (61.7)                 | 113 (72.9)                                 | 1661 (61.1)                                 |                       |
| Nice campus                                            | 175 (6.1)                   | 4 (2.6)                                    | 171 (6.3)                                   |                       |
| Paris campuses                                         | 90 (3.1)                    | 2 (1.3)                                    | 88 (3.2)                                    |                       |
| Versailles campuses                                    | 290 (10.1)                  | 12 (7.7)                                   | 278 (10.2)                                  |                       |
| Other                                                  | 546 (19.0)                  | 24 (15.5)                                  | 522 (19.2)                                  |                       |
| University major <sup>1</sup>                          |                             |                                            |                                             | 0.0096                |
| Sciences                                               | 317 (14.4)                  | 23 (18.1)                                  | 294 (14.2)                                  |                       |
| Healthcare                                             | 987 (44.9)                  | 45 (35.4)                                  | 942 (45.4)                                  |                       |
| Economics, management and law                          | 193 (8.8)                   | 5 (4.0)                                    | 188 (9.1)                                   |                       |
| Literature, arts, humanities, and social sciences      | 454 (20.6)                  | 38 (29.9)                                  | 416 (20.1)                                  |                       |
| Other                                                  | 248 (11.3)                  | 16 (12.6)                                  | 232 (11.2)                                  |                       |
| Educational level of parents <sup>2</sup>              |                             |                                            |                                             | 0.1828                |
| Higher education study or university                   | 1190 (43.3)                 | 57 (38.0)                                  | 1133 (43.7)                                 |                       |
| High school                                            | 681 (24.8)                  | 35 (23.3)                                  | 646 (24.9)                                  |                       |
| Vocational study                                       | 801 (29.2)                  | 51 (34.0)                                  | 750 (28.9)                                  |                       |
| Primary education                                      | 73 (2.7)                    | 7 (4.7)                                    | 66 (2.5)                                    |                       |
| Income source                                          |                             |                                            |                                             |                       |
| Family <sup>3</sup>                                    |                             |                                            |                                             | 0.0080                |
| Yes                                                    | 2402 (90.5)                 | 123 (84.2)                                 | 2279 (90.9)                                 |                       |
| No                                                     | 252 (9.5)                   | 23 (15.8)                                  | 229 (9.1)                                   |                       |
| Scholarship <sup>4</sup>                               |                             |                                            |                                             | 0.1213                |
| Yes                                                    | 1116 (55.2)                 | 56 (48.3)                                  | 1060 (55.6)                                 |                       |
| No                                                     | 905 (44.8)                  | 60 (51.7)                                  | 845 (44.4)                                  |                       |
| Paid employment <sup>5</sup>                           |                             |                                            |                                             | 0.0117                |
| Yes                                                    | 1140 (55.2)                 | 85 (65.9)                                  | 1055 (54.5)                                 |                       |
| No                                                     | 925 (44.8)                  | 44 (34.1)                                  | 881 (45.5)                                  |                       |

\*Chi2 test. Missing data: <sup>1</sup> n=676; <sup>2</sup> n=130; <sup>3</sup> n=221; <sup>4</sup> n=854; <sup>5</sup> n=810. <sup>6</sup> Students excluded: 136 subjects who were no longer students at time of survey and 19 subjects who did not specify their academic status.

**Table S3.** Smokers who responded on supplementary tests and those who did not.

|                                                        | All smokers<br>n=1305<br>n (%) | Partial responders <sup>6</sup><br>n=720<br>n (%) | Full responders <sup>6</sup><br>n=585<br>n (%) | p*      |
|--------------------------------------------------------|--------------------------------|---------------------------------------------------|------------------------------------------------|---------|
| Gender                                                 |                                |                                                   |                                                | 0.8776  |
| Men                                                    | 306 (23.4)                     | 170 (23.6)                                        | 136 (23.2)                                     |         |
| Women                                                  | 999 (77.6)                     | 550 (76.4)                                        | 449 (76.6)                                     |         |
| Age in categories (years)                              |                                |                                                   |                                                | 0.2080  |
| 18 – 20                                                | 638 (48.9)                     | 367 (51.0)                                        | 271 (46.3)                                     |         |
| 21 – 24                                                | 579 (44.4)                     | 309 (42.9)                                        | 270 (46.2)                                     |         |
| 25 and over                                            | 88 (6.7)                       | 44 (6.1)                                          | 44 (7.5)                                       |         |
| Academic year of study                                 |                                |                                                   |                                                | 0.1597  |
| First year                                             | 545 (41.8)                     | 295 (41.0)                                        | 250 (42.8)                                     |         |
| Second year                                            | 285 (21.8)                     | 161 (22.4)                                        | 124 (21.2)                                     |         |
| Third year                                             | 188 (14.4)                     | 93 (12.9)                                         | 95 (16.2)                                      |         |
| Fourth year or higher year of post-secondary education | 287 (22.0)                     | 171 (23.7)                                        | 116 (19.8)                                     |         |
| Universities and higher education institutes location  |                                |                                                   |                                                | 0.5979  |
| Bordeaux campuses                                      | 816 (62.5)                     | 440 (61.1)                                        | 376 (64.3)                                     |         |
| Nice campus                                            | 66 (5.1)                       | 34 (4.7)                                          | 32 (5.5)                                       |         |
| Paris campuses                                         | 45 (3.4)                       | 27 (3.8)                                          | 18 (3.1)                                       |         |
| Versailles campuses                                    | 132 (10.1)                     | 79 (11.0)                                         | 53 (9.0)                                       |         |
| Other                                                  | 246 (18.9)                     | 140 (19.4)                                        | 106 (18.1)                                     |         |
| University major <sup>1</sup>                          |                                |                                                   |                                                | <0.0001 |
| Sciences                                               | 130 (13.1)                     | 71 (13.1)                                         | 59 (13.2)                                      |         |
| Healthcare                                             | 456 (46.1)                     | 286 (52.8)                                        | 170 (38.0)                                     |         |
| Economics, management and law                          | 104 (10.6)                     | 48 (8.8)                                          | 56 (12.6)                                      |         |
| Literature, arts, humanities, and social sciences      | 209 (21.1)                     | 86 (15.9)                                         | 123 (27.5)                                     |         |
| Other                                                  | 90 (9.1)                       | 51 (9.4)                                          | 39 (8.7)                                       |         |
| Educational level of parents <sup>2</sup>              |                                |                                                   |                                                | 0.2578  |
| Higher education study or university                   | 569 (45.3)                     | 325 (46.9)                                        | 244 (43.3)                                     |         |
| High school                                            | 326 (26.0)                     | 172 (24.8)                                        | 154 (27.4)                                     |         |
| Vocational study                                       | 338 (26.9)                     | 187 (27.0)                                        | 151 (26.8)                                     |         |
| Primary education                                      | 23 (1.8)                       | 9 (1.3)                                           | 14 (2.5)                                       |         |
| Income source                                          |                                |                                                   |                                                |         |
| Family <sup>3</sup>                                    |                                |                                                   |                                                | 0.0789  |
| Yes                                                    | 1098 (91.5)                    | 616 (92.8)                                        | 482 (89.9)                                     |         |
| No                                                     | 102 (8.5)                      | 48 (7.2)                                          | 54 (10.1)                                      |         |
| Scholarship <sup>4</sup>                               |                                |                                                   |                                                | 0.4230  |
| Yes                                                    | 502 (55.2)                     | 261 (53.9)                                        | 241 (56.6)                                     |         |
| No                                                     | 408 (44.8)                     | 223 (46.1)                                        | 185 (43.4)                                     |         |
| Paid employment <sup>5</sup>                           |                                |                                                   |                                                | 0.3163  |
| Yes                                                    | 534 (58.0)                     | 281 (56.5)                                        | 253 (59.8)                                     |         |
| No                                                     | 386 (42.0)                     | 216 (43.5)                                        | 170 (40.2)                                     |         |
| Smoking cessation underway                             |                                |                                                   |                                                | <0.0001 |
| No                                                     | 1177 (90.2)                    | 720 (100.0)                                       | 457 (78.1)                                     |         |
| Yes                                                    | 128 (9.8)                      | 0 (0.0)                                           | 128 (21.9)                                     |         |

\*Chi2 test. Missing data: <sup>1</sup> n= 316; <sup>2</sup> n=49; <sup>3</sup> n=105; <sup>4</sup> n=395; <sup>5</sup> n=385. <sup>6</sup> Full responders: current smokers who filled in supplementary items about their nicotine dependence, number of attempts to quit smoking and desire for stopping.

**Figure S1.** Questions about e-cigarette use and reasons for experimenting with it.

**Question 1: Have you ever tried an electronic cigarette at least once in your lifetime? One possible answer**

NO ☐ YES ☐

**Question1.1: If « YES » to question 1: Why did you try it? Several possible answers**

*To stop (or try to stop) smoking* ☐

*To smoke less but without stopping* ☐

*Someone offered me one* ☐

*Because I received an e-cigarette as a gift* ☐

*Because my friends were smoking them* ☐

*Because you can smoke e-cigarettes in places where smoking is prohibited* ☐

*Because e-cigarettes are less harmful than tobacco for health* ☐

*Because smoking e-cigarettes are cheaper than smoking tobacco* ☐

*To never start smoking* ☐

*Out of curiosity* ☐

*Because of the flavors on offer* ☐

*To do the same as someone in my family* ☐

*To do the same as someone I know: friend or colleague* ☐

*I don't know* ☐

*Other reasons* ☐

**Question 2: If « YES » to question 1: Do you still use electronic cigarettes (occasionally or daily)? One possible answer**

NO ☐ YES ☐

**Question 2.1: If « YES » to question 2: How often do you use electronic cigarettes on average? One possible answer**

*Daily* ☐

*Less than once a day but at least once a week* ☐

*Less than once a week but at least once a month* ☐

*Less than once a month* ☐
